# Supplementary material for: Theoretical investigation of rare gas adsorption on and inside B-doped carbon nanotubes by DFT, QTAIM and NBO
Source: Royal Society of Chemistry journal article supplement (doi:10.1039/c5ra10657e), 2015-01-01
Supplement: c5ra10657e1.pdf [file c5ra10657e1.pdf]

Table S1 Adsorption energies ( $E_{ad}$ , in kJ/mol) of all complexes obtained at the CAM-B3LYP/6-31G\* level

|         | He    | Ne    | Ar     | Kr     |
|---------|-------|-------|--------|--------|
| B1Rg    | -6.6  | -17.2 | -7.1   | -12.5  |
| B2Rg    | -1.9  | -22.9 | -3.1   | -13.9  |
| B1Rg-In | 143.6 | 301.7 | 1049.7 | 1305.0 |

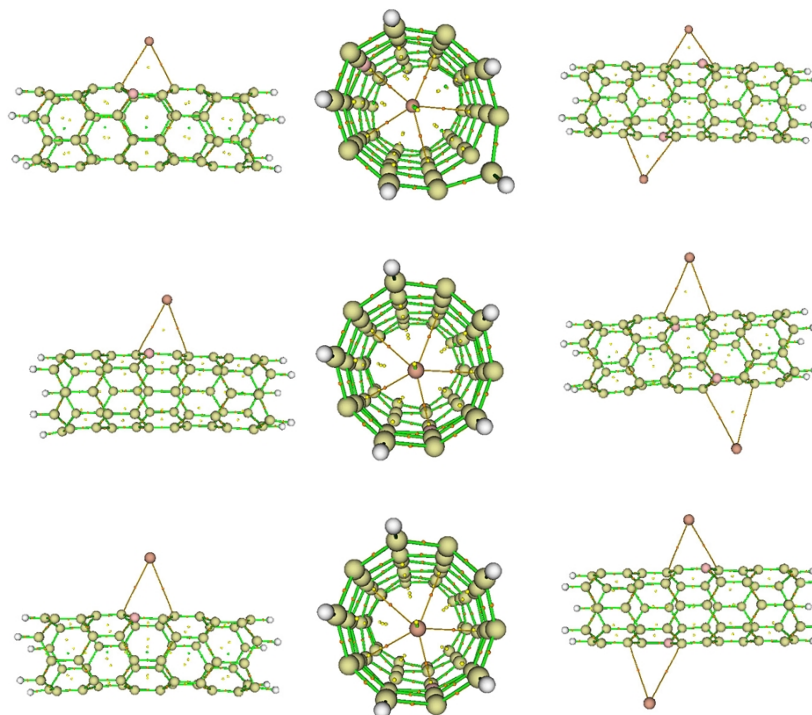

Figure S1 Interaction paths of complexes of Ne, Ar and Kr

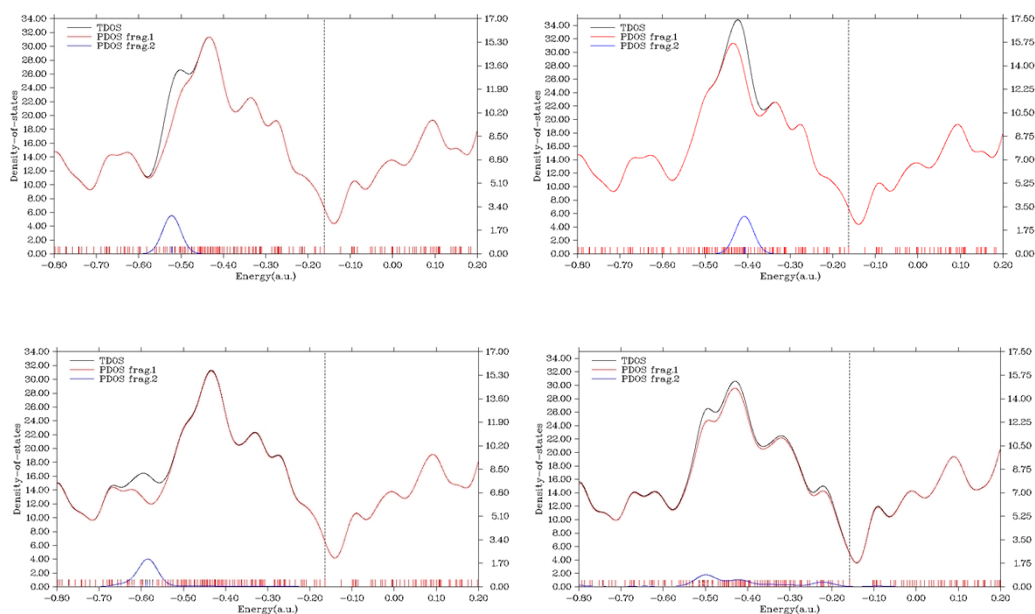

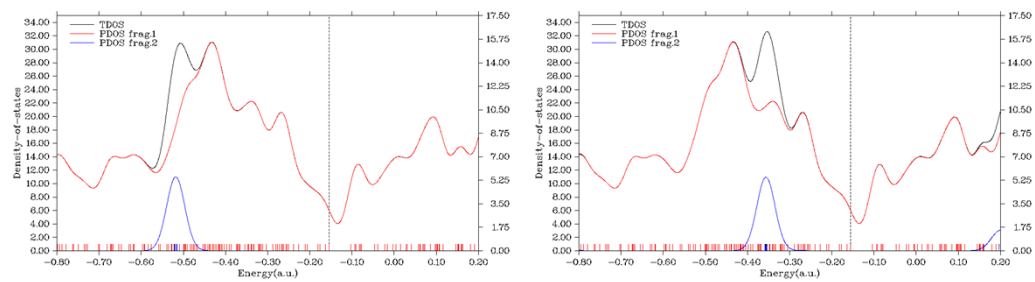

Figure S2 DOS of complexes of Ne and Ar
